# Supplementary material for: IrO2-incorporated La0.8Sr0.2MnO3 as a bifunctional oxygen electrocatalyst with enhanced activities
Source: Royal Society of Chemistry journal article supplement (doi:10.1039/c9qi00033j), 2019-01-01
Supplement: c9qi00033j1.pdf [file c9qi00033j1.pdf]

## Supporting Information

### **IrO<sub>2</sub>-incorporated La<sub>0.8</sub>Sr<sub>0.2</sub>MnO<sub>3</sub> as bifunctional oxygen catalysts with enhanced activities**

Haizhen Wang,<sup>1</sup> Litao Yan,<sup>1</sup> Tom Nakotte,<sup>1</sup> Weichuan Xu,<sup>1</sup> Meng Zhou,<sup>1</sup> Dong Ding,<sup>2,\*</sup> and

Hongmei Luo<sup>1,\*</sup>

<sup>1</sup> Department of Chemical and Materials Engineering, New Mexico State University, Las Cruces, NM 88003, United States.

<sup>2</sup> Energy & Environment Science and Technology, Idaho National Laboratory, Idaho Falls, ID 83415, United States.

\*Corresponding authors. E-mails: hluo@nmsu.edu (HL) and dong.ding@inl.gov (DD).

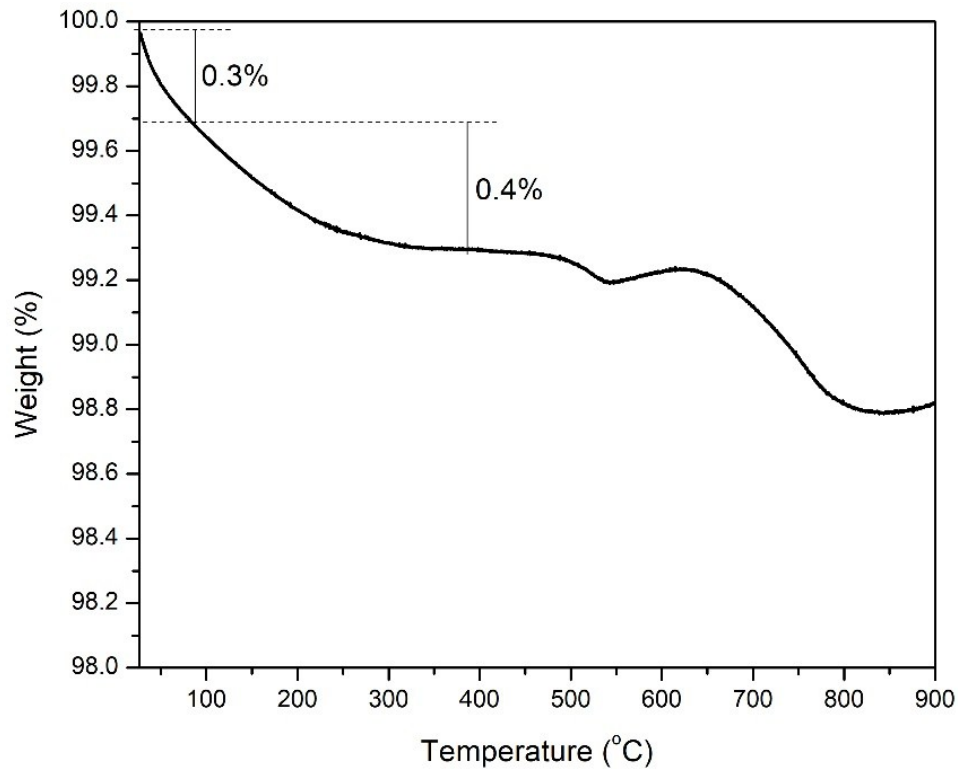

Figure S1. TGA test of  $\text{La}_{0.8}\text{Sr}_{0.2}\text{MnO}_3$  under  $\text{O}_2$  atmosphere.

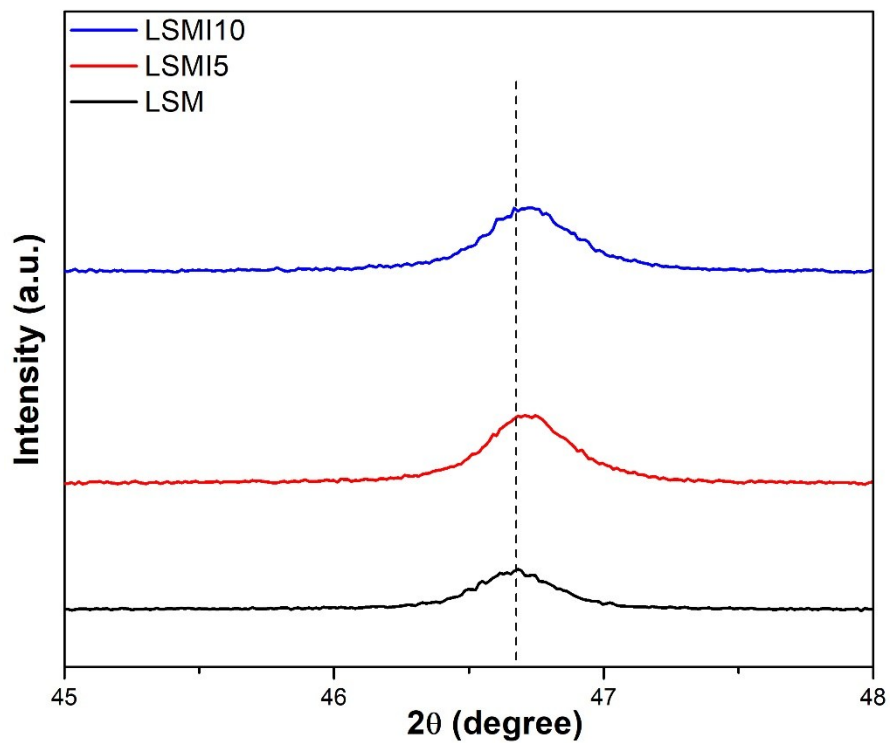

Figure S2. The enlarged XRD of the pristine  $\text{La}_{0.8}\text{Sr}_{0.2}\text{MnO}_3$  (LSM), 5 wt%  $\text{IrO}_2$ - $\text{La}_{0.8}\text{Sr}_{0.2}\text{MnO}_3$  (LSMI) and 10 wt%  $\text{IrO}_2$ - $\text{La}_{0.8}\text{Sr}_{0.2}\text{MnO}_3$  (LSMI10) in the range of  $2\theta$  from 45-48°, respectively.

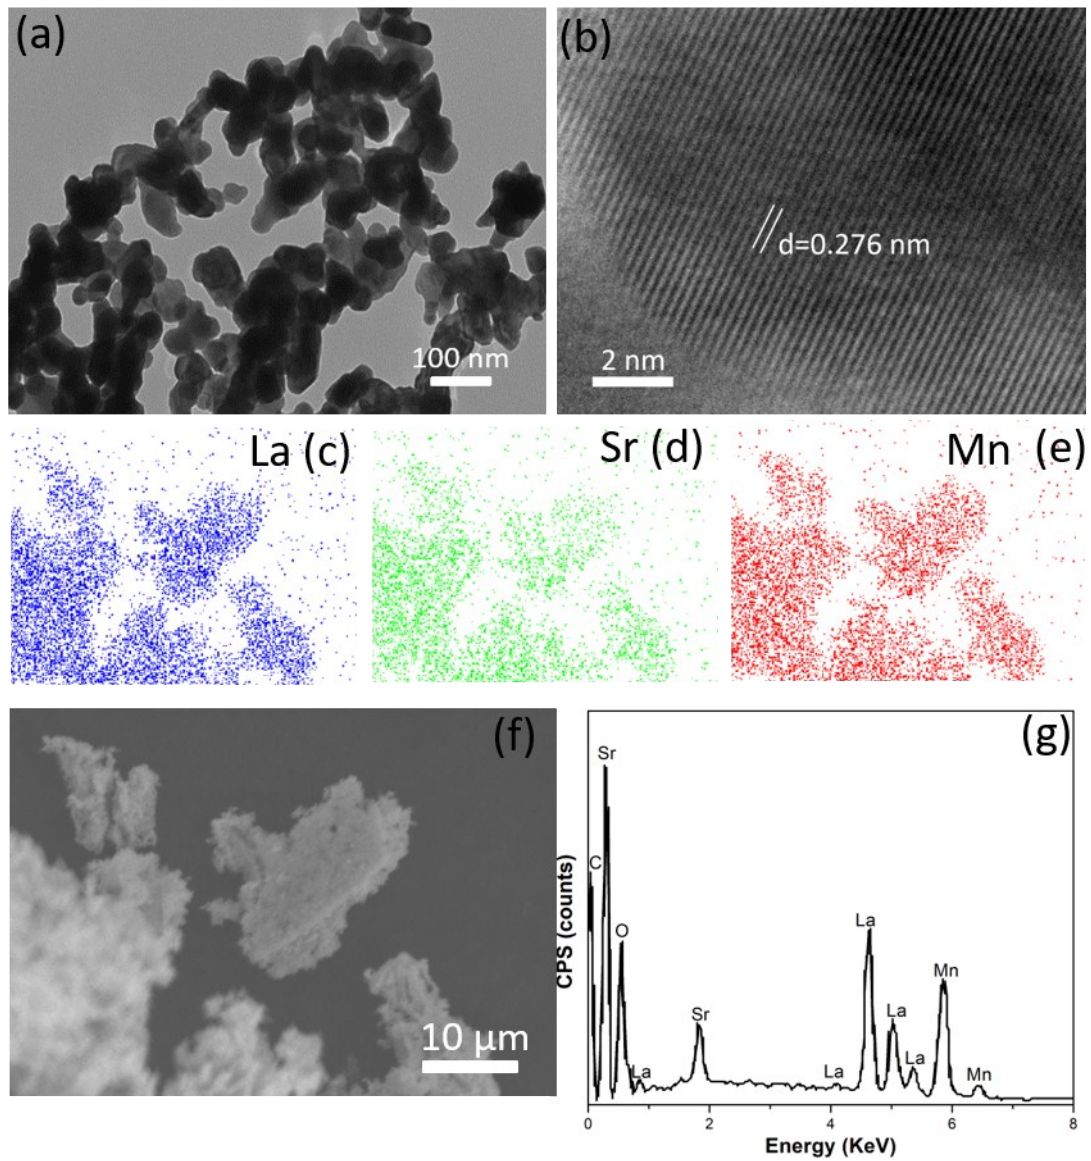

Figure S3. TEM (a), HRTEM (b) and SEM (f) image of the pristine  $\text{La}_{0.8}\text{Sr}_{0.2}\text{MnO}_3$ ; EDX mapping of (c) La, (d) Sr, (e) Mn and (g) EDS spectra of pristine  $\text{La}_{0.8}\text{Sr}_{0.2}\text{MnO}_3$ , respectively.

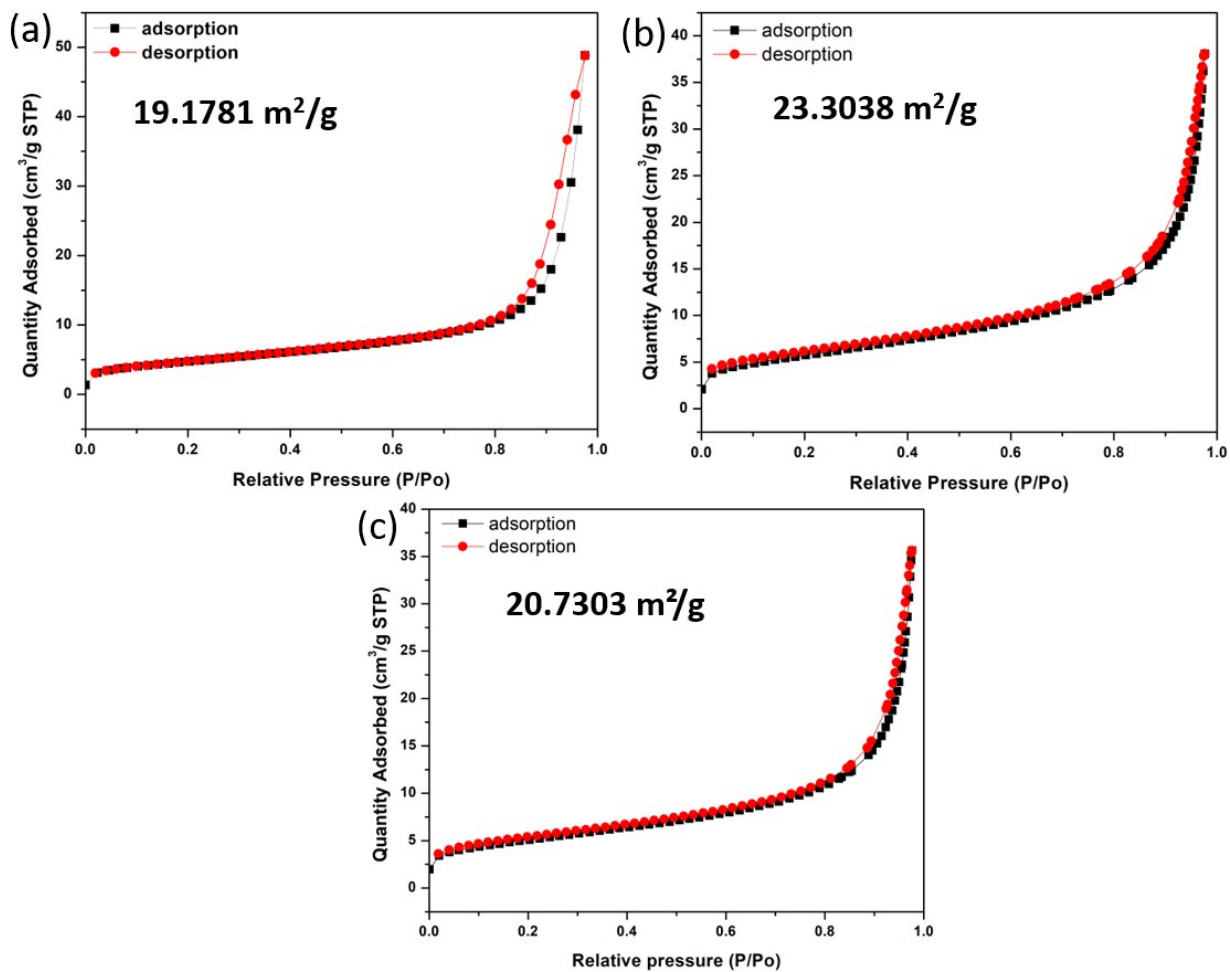

Figure S4. BET test for the pristine  $\text{La}_{0.8}\text{Sr}_{0.2}\text{MnO}_3$  (a), 5 wt%  $\text{IrO}_2\text{-La}_{0.8}\text{Sr}_{0.2}\text{MnO}_3$  (b) and 10 wt%  $\text{IrO}_2\text{-La}_{0.8}\text{Sr}_{0.2}\text{MnO}_3$  (c), respectively.

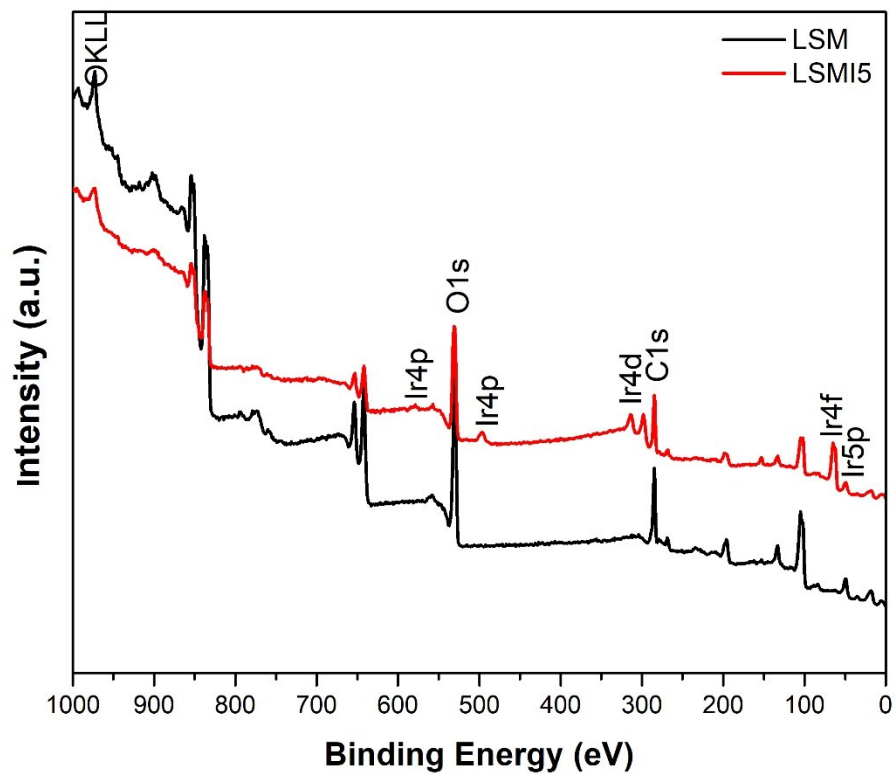

Figure S5. The XPS entire survey scan for the pristine  $\text{La}_{0.8}\text{Sr}_{0.2}\text{MnO}_3$  (LSM) and 5 wt%  $\text{IrO}_2$ - $\text{La}_{0.8}\text{Sr}_{0.2}\text{MnO}_3$  (LSMI5), respectively.

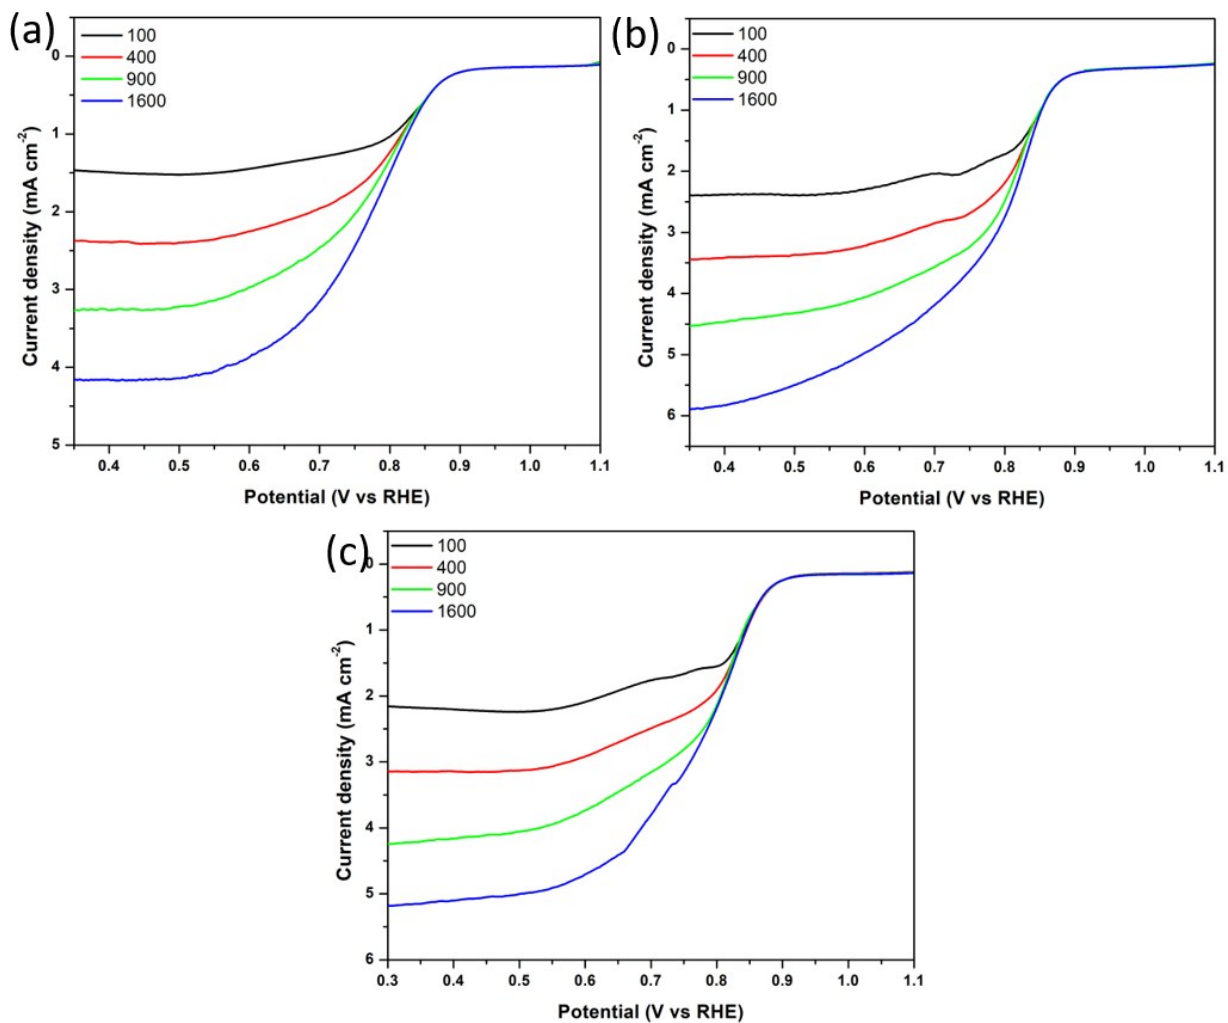

Figure S6. LSV polarization curves (ORR) of (a)  $\text{La}_{0.8}\text{Sr}_{0.2}\text{MnO}_3$ , (b) 5 wt%  $\text{IrO}_2$ - $\text{La}_{0.8}\text{Sr}_{0.2}\text{MnO}_3$  and (c) 10 wt%  $\text{IrO}_2$ - $\text{La}_{0.8}\text{Sr}_{0.2}\text{MnO}_3$  in  $\text{O}_2$ -saturated  $0.1 \text{ mol L}^{-1}$  KOH with a scan rate of  $10 \text{ mV s}^{-1}$  under four (100, 400, 900 and 1600 rpm) different rotation rates.

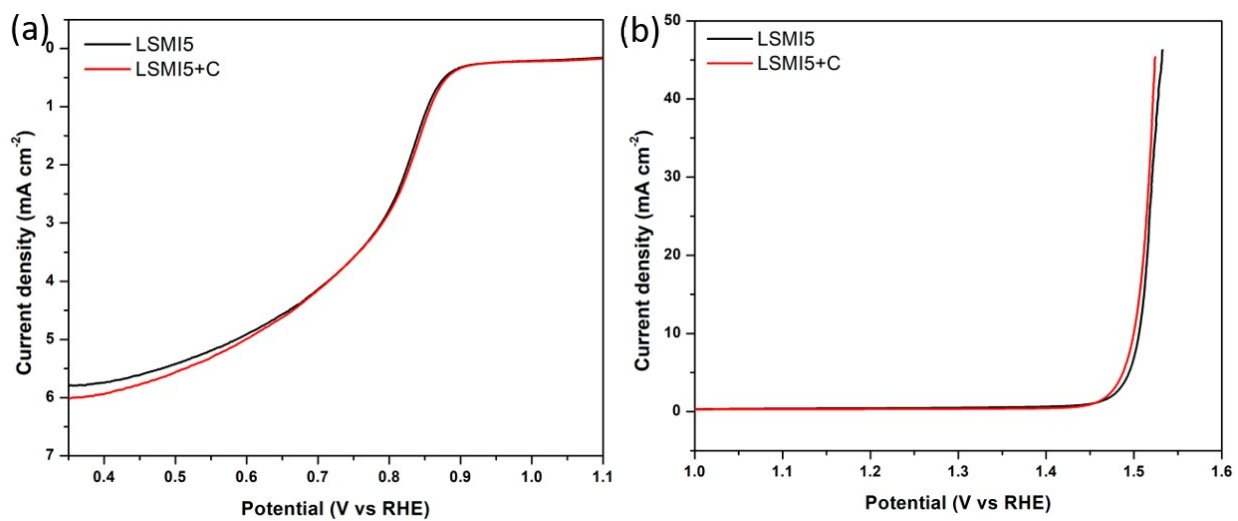

Figure S7. LSV curves of ORR (a) and OER (b) performance comparison between LSMI5 with/without carbon black in 0.1 mol L<sup>-1</sup> KOH solution with a scan rate of 10 mV s<sup>-1</sup> at a rotation speed of 1600 rpm.

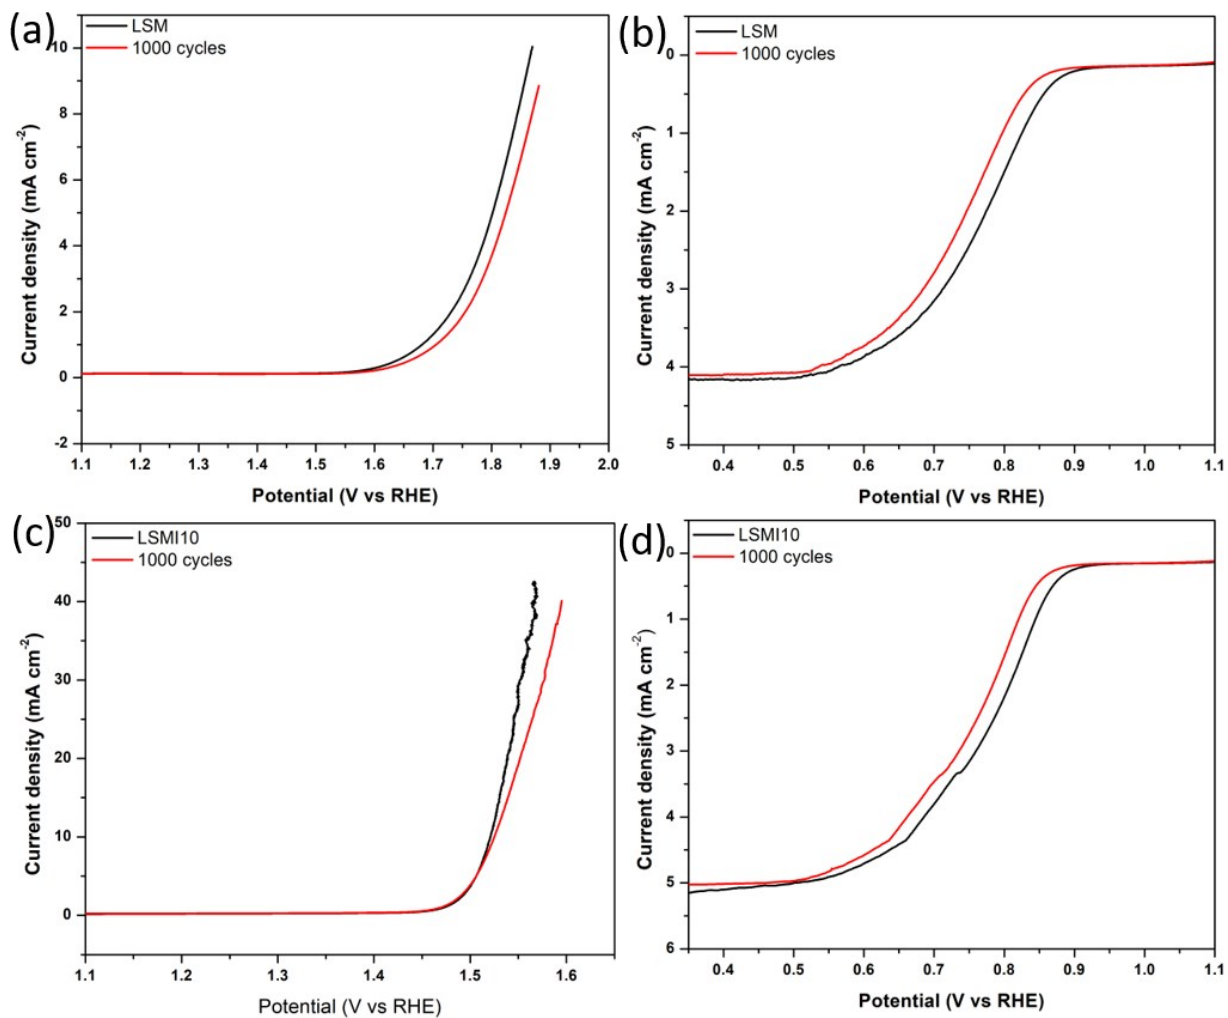

Figure S8. Stability test of the pristine  $\text{La}_{0.8}\text{Sr}_{0.2}\text{MnO}_3$  (LSM) and 10 wt%  $\text{IrO}_2$ - $\text{La}_{0.8}\text{Sr}_{0.2}\text{MnO}_3$  (LSMI10). LSVs of OER (a, c) and ORR (b, d) tested in  $\text{O}_2$ -saturated  $0.1 \text{ mol L}^{-1}$  KOH solution before and after 1000 cycles at a sweep rate of  $50 \text{ mV s}^{-1}$  with a rotation speed of 1600 rpm.
